# Supplementary material for: Monitoring strategies of stream phosphorus under contrasting climate-driven flow regimes
Source: Copernicus journal article supplement (doi:10.5194/hess-19-4099-2015), 2015-10-08
Supplement: Supplementary file 2 [file hess-19-4099-2015-supplement.zip]

# Pintado's stream (Santa Lucía Chico River Basin)

## Uruguay, South America

### FLASHY/high-LUI

- inland waters
- - - - minor or intermittent watercourses

### Land use

- artificial forest
- artificial surfaces
- grassland
- milk farms/crops
- milking plants
- pond
- road
- catchment

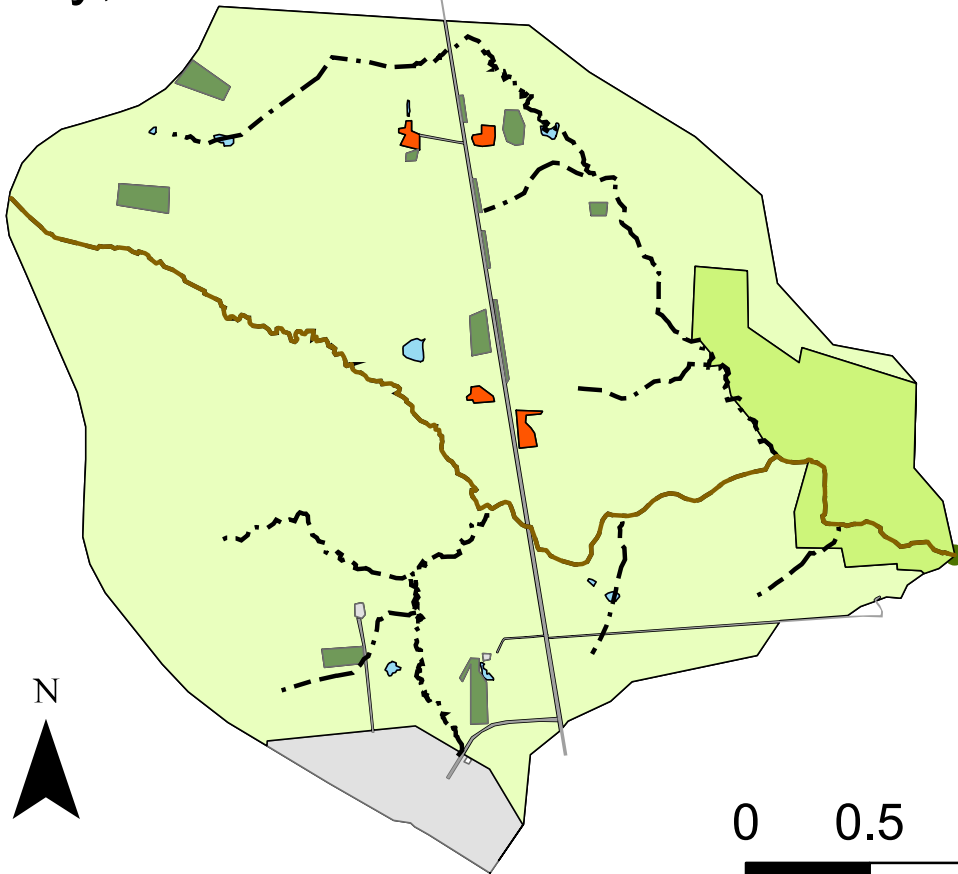

0 0.5 1 2  
Kilometers
