# Supplementary material for: Monitoring strategies of stream phosphorus under contrasting climate-driven flow regimes
Source: Copernicus journal article supplement (doi:10.5194/hess-19-4099-2015), 2015-10-08
Supplement: Supplementary file 3 [file hess-19-4099-2015-supplement.zip]

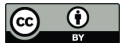

## *Supplement of*

# **Monitoring strategies of stream phosphorus under contrasting climate-driven flow regimes**

**G. Goyenola et al.**

*Correspondence to:* G. Goyenola (goyenola@gmail.com)

- hess-19-4099-2015-supplement-title-page.pdf
- supplementary material
  - Thumbs.db
  - fig S1-S4 - land use intensity
    - \* FigS1-lowLUI-STABLE.pdf
    - \* FigS2-highLUI-STABLE.pdf
    - \* FigS3-lowLUI-FLASHY.pdf
    - \* FigS4-highLUI-FLASHY.pdf
  - fig S5 - comparison
    - \* caption figS5.docx
    - \* figS5.PDF

The copyright of individual parts of the supplement might differ from the CC-BY 3.0 licence.
