# Supplementary material for: Monitoring strategies of stream phosphorus under contrasting climate-driven flow regimes
Source: Copernicus journal article supplement (doi:10.5194/hess-19-4099-2015), 2015-10-08

low Land Use Intensity

STABLE

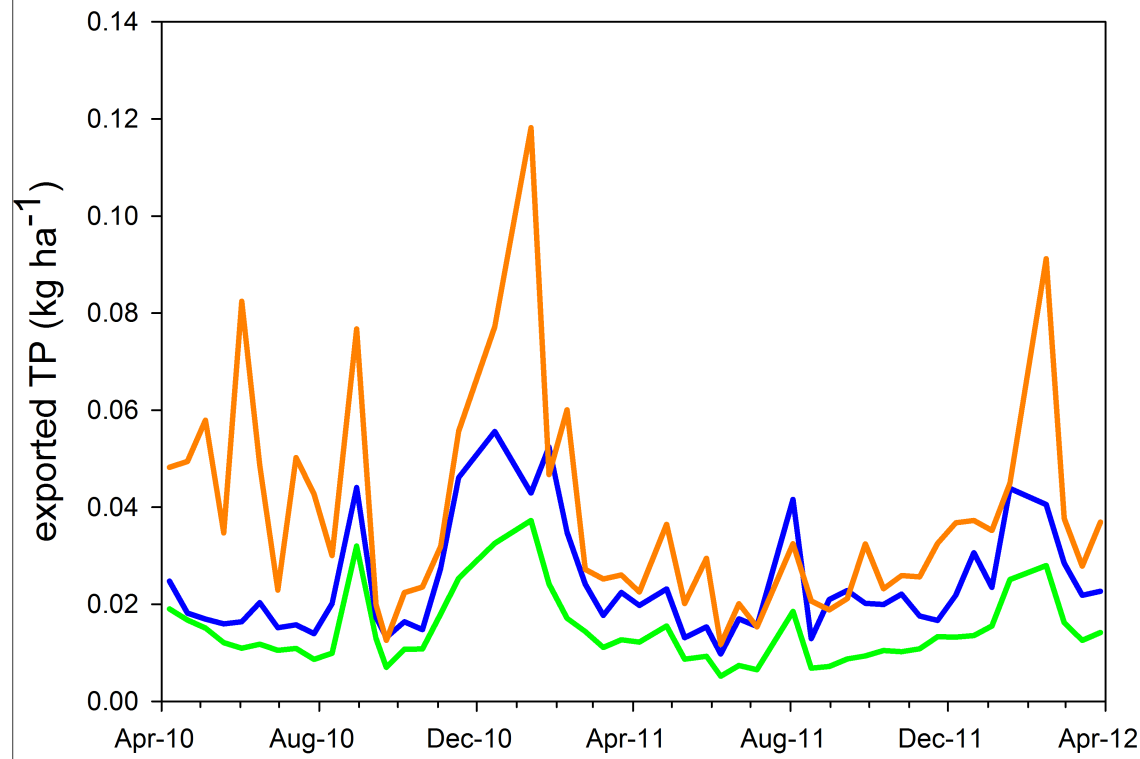

high Land Use Intensity

exported TP (kg ha<sup>-1</sup>)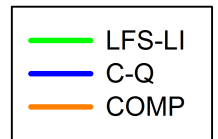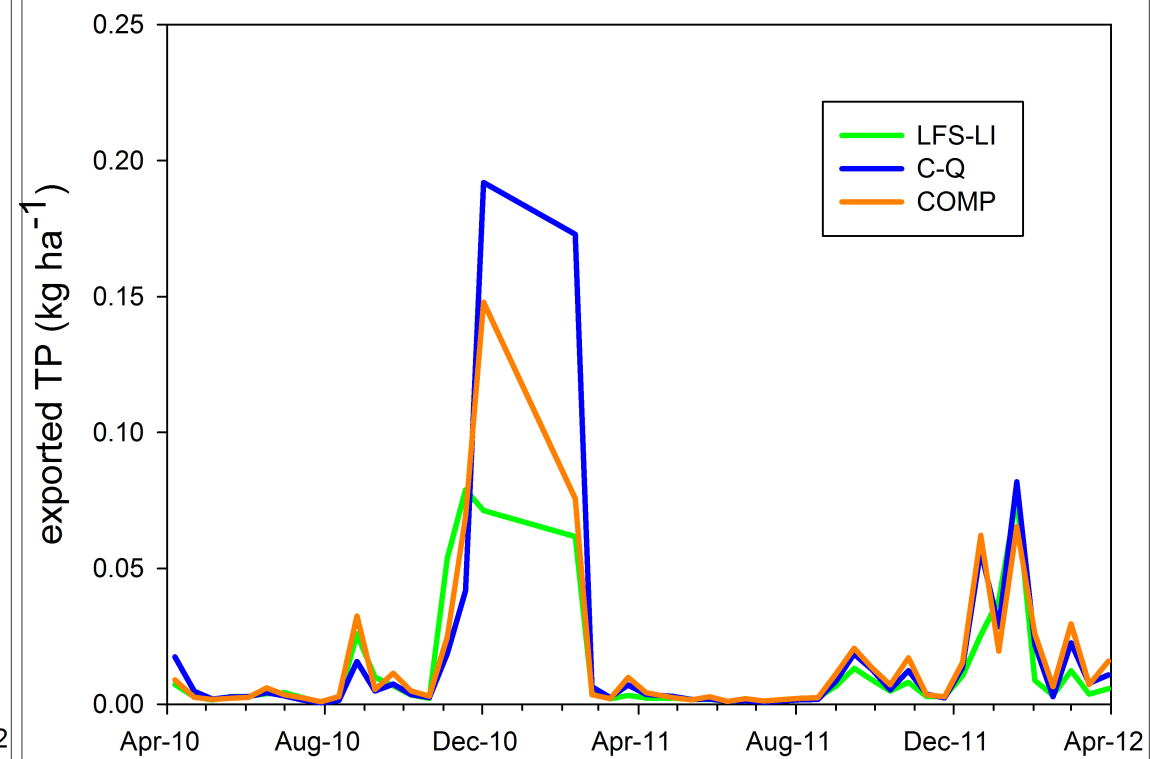

FLASHY

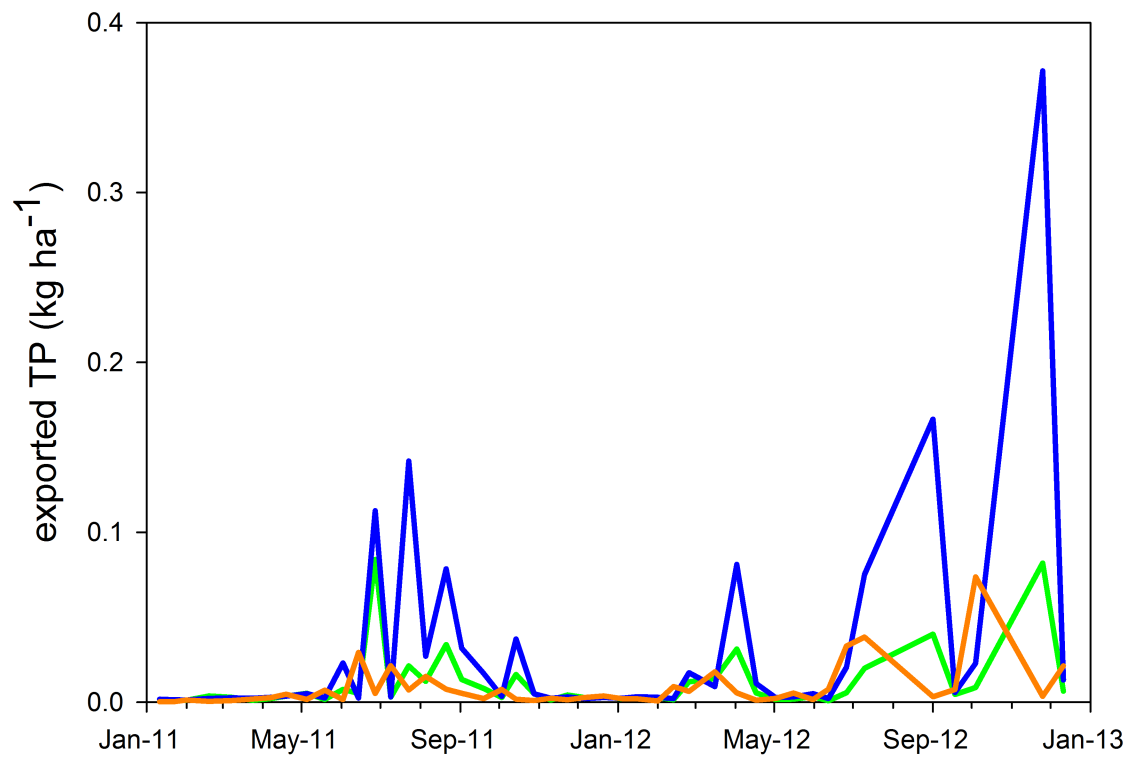exported TP (kg ha<sup>-1</sup>)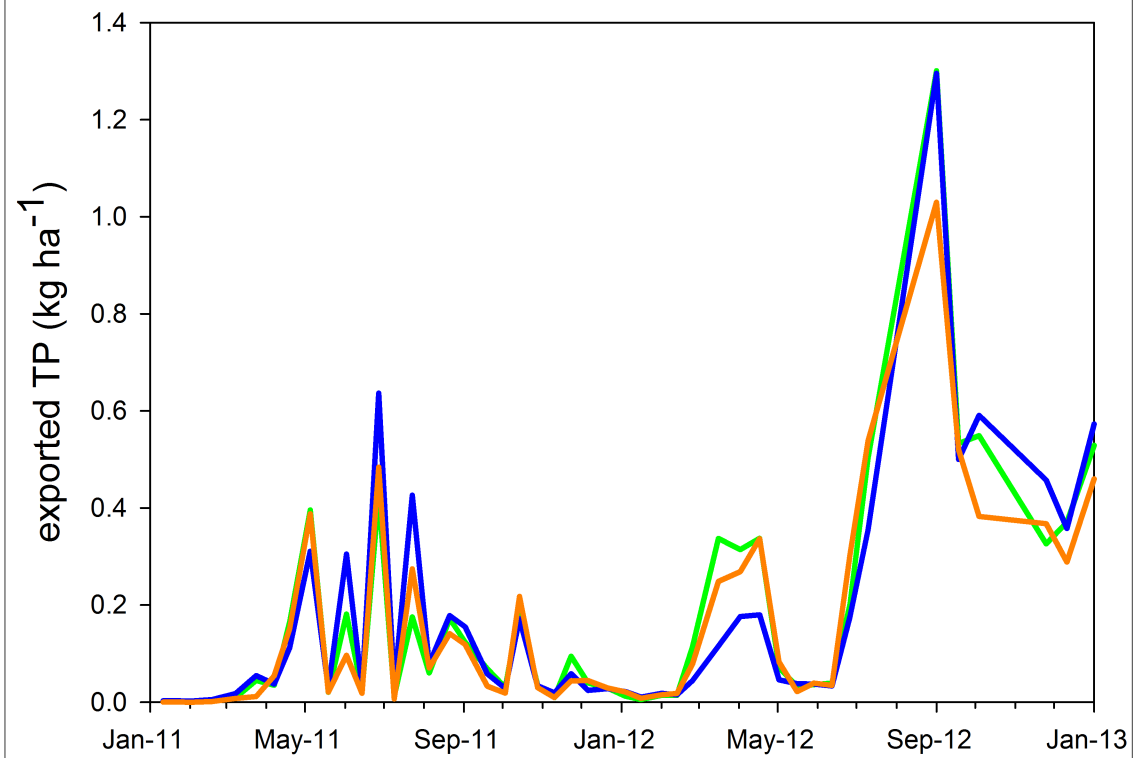

Supplement: Supplementary file 4 [file hess-19-4099-2015-supplement.zip]
