# Supplementary figures and images for: Monitoring strategies of stream phosphorus under contrasting climate-driven flow regimes
Source: Copernicus journal article supplement (doi:10.5194/hess-19-4099-2015), 2015-10-08

# Granslev stream (Gudenå River Basin) Denmark, Europe

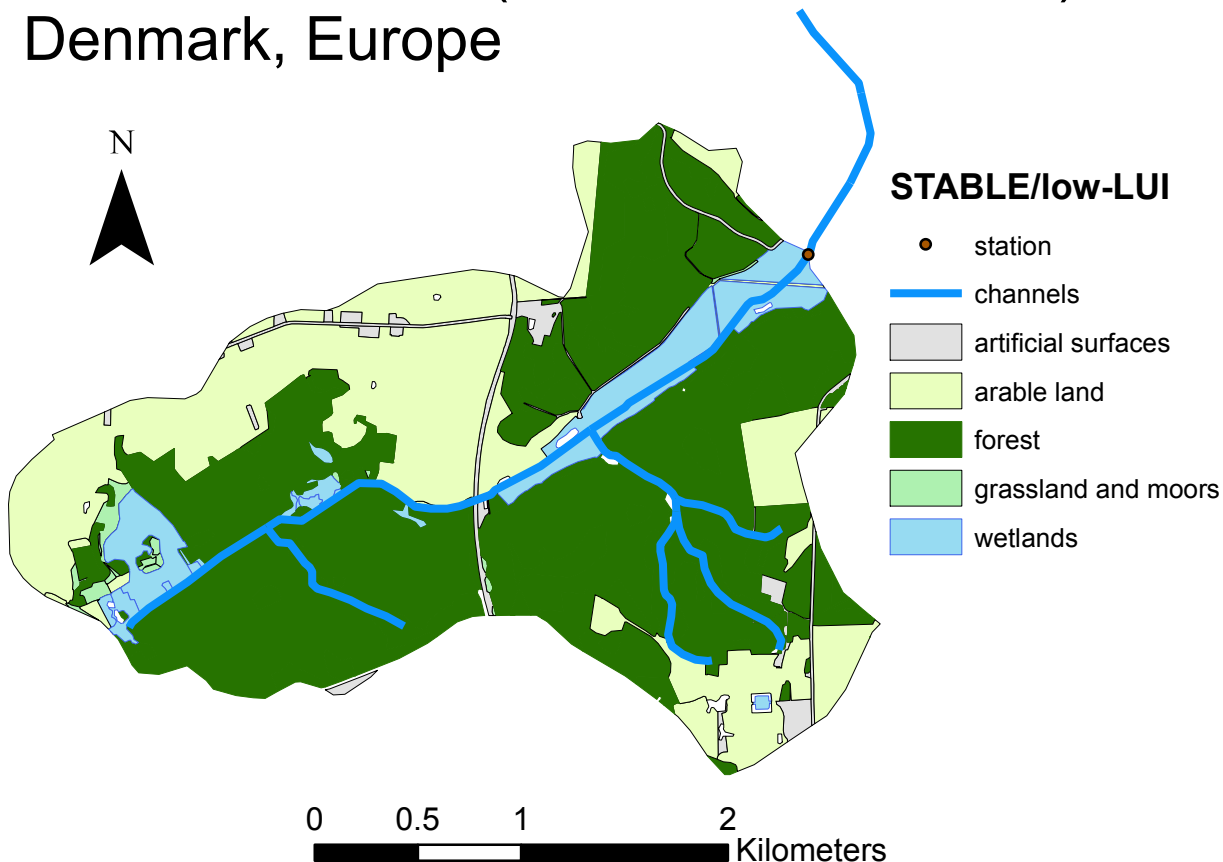

Supplement: Supplementary file 1 [file hess-19-4099-2015-supplement.zip]

# Chal-Chal stream (Santa Lucía Chico River Basin) Uruguay, South America

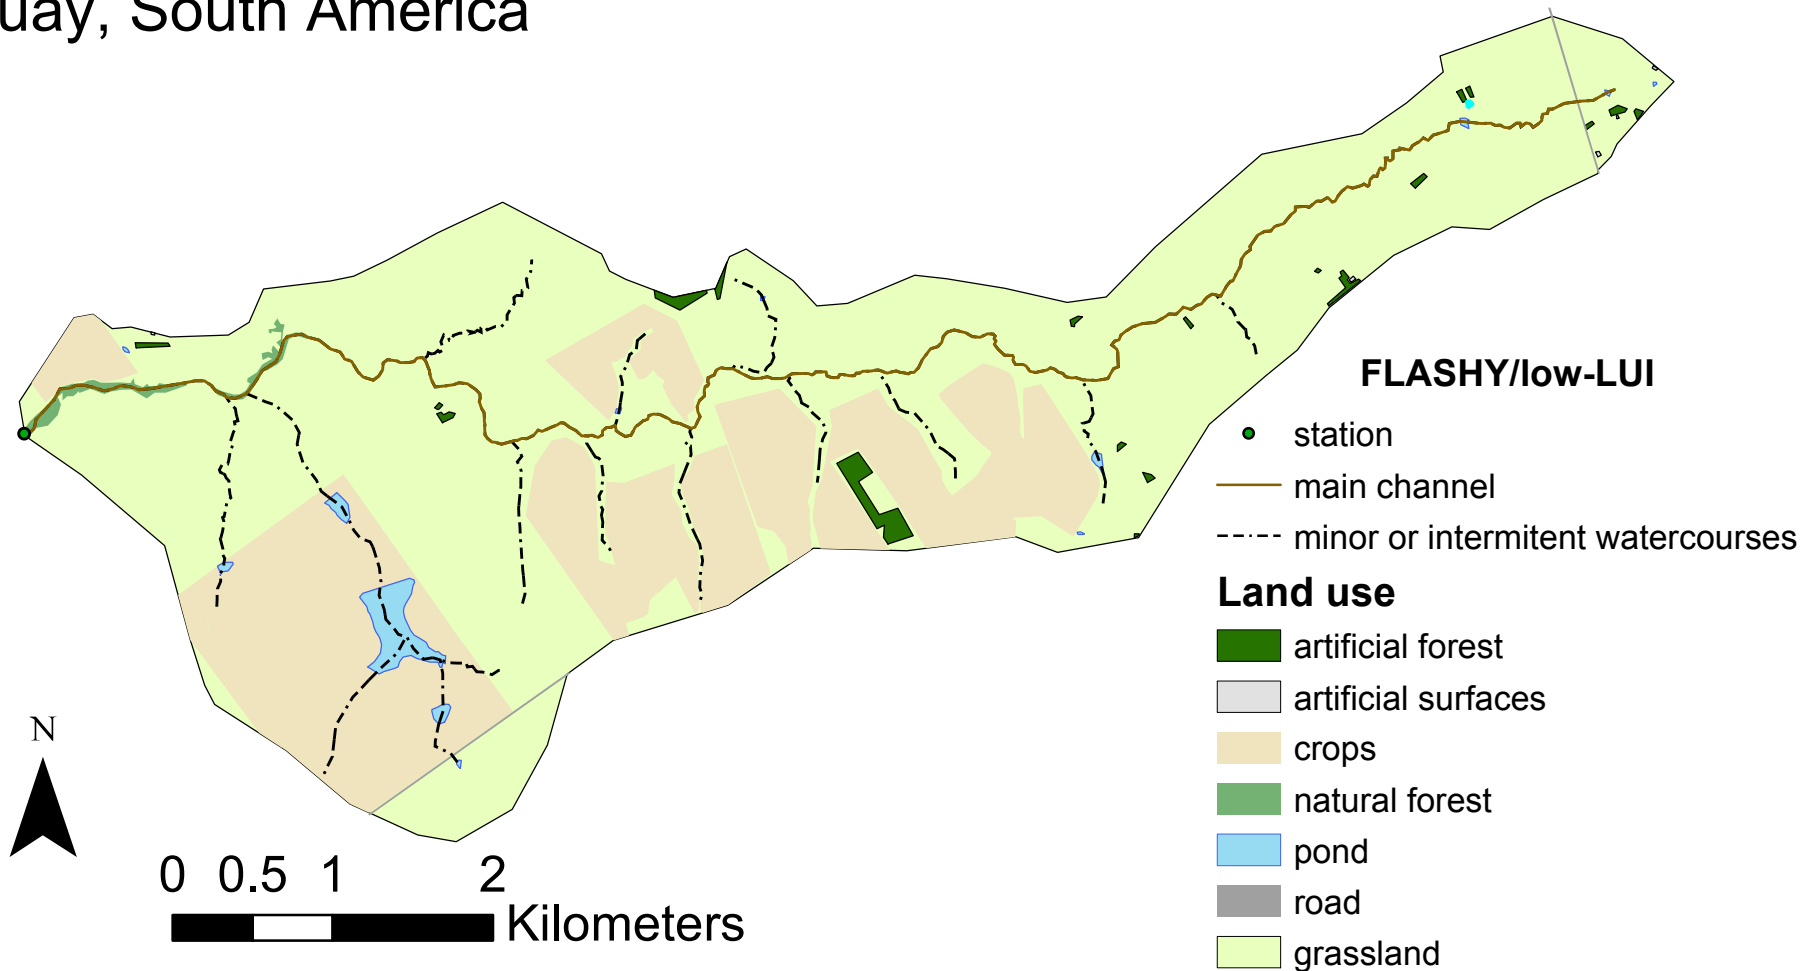

Supplement: Supplementary file 5 [file hess-19-4099-2015-supplement.zip]

# Gelbæk stream (Gudenå River Basin)

## Denmark, Europe

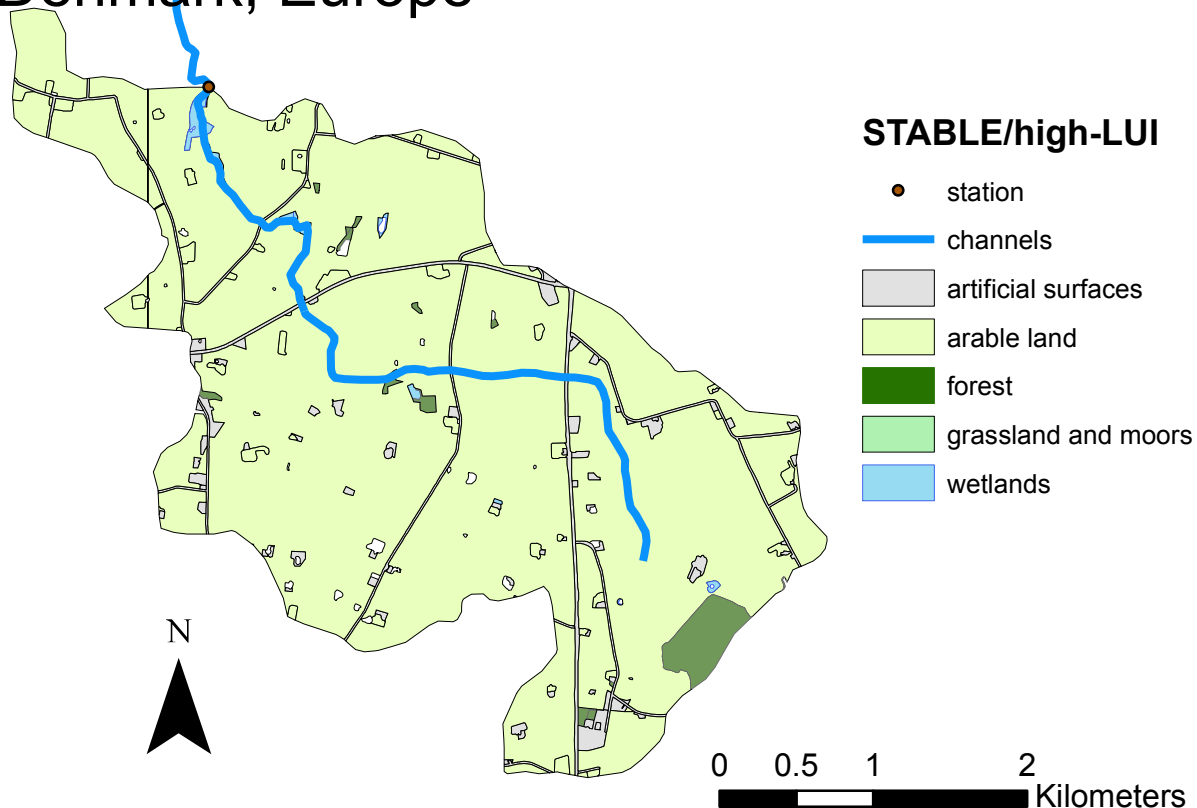

Supplement: Supplementary file 6 [file hess-19-4099-2015-supplement.zip]
